# Supplementary material for: Insight into the impact of Al distribution on the catalytic performance of 1-octene aromatization over ZSM-5 zeolite
Source: Royal Society of Chemistry journal article supplement (doi:10.1039/c9cy01672d), 2019-01-01
Supplement: c9cy01672d1.pdf [file c9cy01672d1.pdf]

## Supporting Information

### Insight into the impact of Al distributions on catalytic performance of 1-octene aromatization over ZSM-5 zeolite

Liwei Zhang, <sup>a,c</sup> Huaikang Zhang, <sup>a,b</sup> Zhiqiang Chen, <sup>a,c</sup> Qiang Ning, <sup>a,b</sup> Suyao Liu, <sup>b \*</sup>

Jie Ren, <sup>a,b \*</sup> Xiaodong Wen, <sup>a,b</sup> Yong-Wang Li <sup>a,b</sup>

<sup>a</sup> State Key Laboratory of Coal Conversion, Institute of Coal Chemistry, Chinese Academy of Sciences, Taiyuan 030001, PR China

<sup>b</sup> National Energy Research Center for Clean Fuels, Synfuels China Co., Ltd, Beijing, 101400, PR China

<sup>c</sup> University of Chinese Academy of Sciences, Beijing 100049, PR China

\* Corresponding authors: Suyao Liu (liusuyao@synfuelschina.com.cn, Tel.: +86 010 6068 3824);

Jie Ren (renjie@sxicc.ac.cn, Tel.: +86 010 6966 7855)

Alkylation of benzene with 1-octene was carried out in the same fixed-bed stainless-steel reactor as the 1-octene aromatization. In a typical experiment, the pre-treatment of the ZSM-5-S zeolite catalyst was the same to the 1-octene aromatization. When the reaction temperature decreased to the target temperature (380 °C), the feedstock with a molar ratio of 1-octene to benzene of 2.0 was fed into the reactor at a certain flow rate. The reaction conditions for this catalytic test were the following: pressure was 1.0 MPa, volume ratio of N<sub>2</sub>/feed was 300, and the liquid hourly space velocity (LHSV) was set at 2.0 h<sup>-1</sup>. The products collection and analysis method were the same to the 1-octene aromatization. In each experiment, the carbon balance was maintained above 95%. The calculations method of conversion and selectivity were shown as follows:

$$\text{Conversion of 1-octene (\%)} = \frac{w_0 - w_1}{w_0} \times 100$$

$$\text{Conversion of benzene (\%)} = \frac{w_2 - w_3}{w_2} \times 100$$

$$\text{Products Selectivity (\%)} = \frac{w_i}{w_0 - w_1} \times 100$$

$w_0$  and  $w_1$  represent the weights of 1-octene in the feed and product, respectively;  $w_2$

and  $w_3$  represent the weights of benzene in the feed and product, respectively;

$w_i$  denotes the weight of products which reactant converted to.

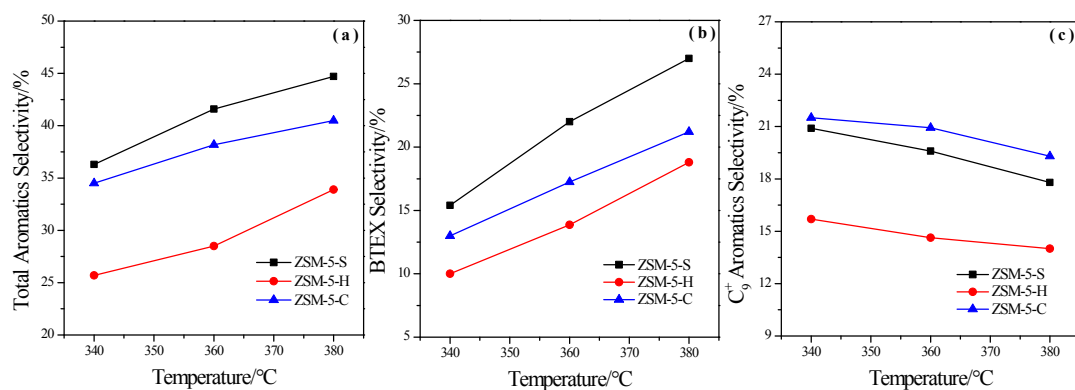

**Fig. S1** Total aromatics (a), BTEX (b) and C<sub>9</sub><sup>+</sup> (c) selectivity over ZSM-5-S, ZSM-5-H, and ZSM-5-C catalysts for 1-octene aromatization.

(Reaction conditions: time on steam = 6.0 h, pressure = 1.0 MPa, N<sub>2</sub>/1-octene = 300, LHSV = 2.0 h<sup>-1</sup>.)

**Table S1** 1-octene conversion and products selectivity over different ZSM-5 catalyst for 1-octene aromatization

| Catalysts | 1-octene<br>con. (%) <sup>a</sup> | Products Selectivity (%) <sup>a</sup> |                |                             |                             |                             |                             |                             |                             |                             |                             |                             |                             |                             |                             |                             |
|-----------|-----------------------------------|---------------------------------------|----------------|-----------------------------|-----------------------------|-----------------------------|-----------------------------|-----------------------------|-----------------------------|-----------------------------|-----------------------------|-----------------------------|-----------------------------|-----------------------------|-----------------------------|-----------------------------|
|           |                                   | CH <sub>4</sub>                       | C <sub>2</sub> | C <sub>3</sub> <sup>0</sup> | C <sub>3</sub> <sup>=</sup> | C <sub>4</sub> <sup>0</sup> | C <sub>4</sub> <sup>=</sup> | C <sub>5</sub> <sup>0</sup> | C <sub>5</sub> <sup>=</sup> | C <sub>6</sub> <sup>0</sup> | C <sub>6</sub> <sup>=</sup> | C <sub>7</sub> <sup>0</sup> | C <sub>7</sub> <sup>=</sup> | C <sub>8</sub> <sup>0</sup> | C <sub>8</sub> <sup>=</sup> | C <sub>9</sub> <sup>+</sup> |
| ZSM-5-S   | 99.9                              | 0.1                                   | 0.7            | 17.7                        | 0.3                         | 14.6                        | 0.3                         | 6.5                         | 0.2                         | 3.0                         | 0.6                         | 1.3                         | 0.9                         | 2.5                         | 2.5                         | 0.2                         |
| ZSM-5-H   | 99.9                              | 0.1                                   | 0.8            | 15.2                        | 0.6                         | 18.7                        | 0.3                         | 9.5                         | 0.5                         | 4.2                         | 1.0                         | 2.2                         | 1.2                         | 2.3                         | 4.3                         | 1.5                         |
| ZSM-5-C   | 99.4                              | 0.2                                   | 0.8            | 20.1                        | 0.3                         | 12.3                        | 0.7                         | 6.0                         | 0.8                         | 4.7                         | 0.8                         | 1.5                         | 1.1                         | 1.7                         | 4.7                         | 1.8                         |

| Products Selectivity (%) <sup>a</sup> |         |         |              |        |                             |                              |                                           |      |                    |  |
|---------------------------------------|---------|---------|--------------|--------|-----------------------------|------------------------------|-------------------------------------------|------|--------------------|--|
| Cycloalkane                           | Benzene | Toluene | Ethylbenzene | Xylene | C <sub>9</sub><br>aromatics | C <sub>10</sub><br>aromatics | C <sub>11</sub> <sup>+</sup><br>aromatics | BETX | Total<br>Aromatics |  |
| 1.4                                   | 2.2     | 10.3    | 1.7          | 12.8   | 7.1                         | 2.2                          | 8.5                                       | 27.0 | 44.7               |  |
| 3.5                                   | 1.3     | 7.3     | 1.6          | 8.6    | 6.4                         | 2.4                          | 6.3                                       | 18.8 | 33.9               |  |
| 1.7                                   | 1.8     | 8.2     | 1.6          | 9.6    | 6.3                         | 3.9                          | 9.1                                       | 21.2 | 40.5               |  |

<sup>a</sup> the 1-octene conversion and products selectivity are estimated with the time on steam of 6.0 h;

C<sub>i</sub><sup>=</sup> and C<sub>i</sub><sup>0</sup> mean the alkene and alkane hydrocarbon with i carbon atom, respectively; Reaction conditions: pressure = 1.0 MPa, temperature =380 °C, N<sub>2</sub>/1-octene = 300, LHSV = 2.0 h<sup>-1</sup>.

**Table S2** 1-octene and benzene conversion as well as the products selectivity over ZSM-5-S catalyst for alkylation reaction of benzene with 1-octene

| Catalysts | Benzene<br>con. (%) <sup>a</sup> | 1-octene<br>con. (%) <sup>a</sup> | Products Selectivity (%) <sup>a</sup> |                |                             |                             |                             |                             |                             |                             |                             |                             |                             |                             |                |
|-----------|----------------------------------|-----------------------------------|---------------------------------------|----------------|-----------------------------|-----------------------------|-----------------------------|-----------------------------|-----------------------------|-----------------------------|-----------------------------|-----------------------------|-----------------------------|-----------------------------|----------------|
|           |                                  |                                   | CH <sub>4</sub>                       | C <sub>2</sub> | C <sub>3</sub> <sup>0</sup> | C <sub>3</sub> <sup>=</sup> | C <sub>4</sub> <sup>0</sup> | C <sub>4</sub> <sup>=</sup> | C <sub>5</sub> <sup>0</sup> | C <sub>5</sub> <sup>=</sup> | C <sub>6</sub> <sup>0</sup> | C <sub>6</sub> <sup>=</sup> | C <sub>7</sub> <sup>0</sup> | C <sub>7</sub> <sup>=</sup> | C <sub>8</sub> |
| ZSM-5-S   | 47.5                             | 99.9                              | 0.1                                   | 0.4            | 12.0                        | 0.2                         | 10.0                        | 0.8                         | 5.3                         | 1.1                         | 2.6                         | 0.9                         | 1.1                         | 0.9                         | 3.1            |

  

| Products Selectivity (%) <sup>a</sup> |             |         |              |        |                             |                              |                                           |      |                    |
|---------------------------------------|-------------|---------|--------------|--------|-----------------------------|------------------------------|-------------------------------------------|------|--------------------|
| C <sub>9</sub> <sup>+</sup>           | Cycloalkane | Toluene | Ethylbenzene | Xylene | C <sub>9</sub><br>aromatics | C <sub>10</sub><br>aromatics | C <sub>11</sub> <sup>+</sup><br>aromatics | TEX  | Total<br>Aromatics |
| 2.7                                   | 1.2         | 11.3    | 8.7          | 7.6    | 7.4                         | 5.0                          | 12.2                                      | 35.1 | 52.2               |

a, the conversion and products selectivity are estimated with the time on steam of 6.0 h;

C<sub>i</sub><sup>=</sup> and C<sub>i</sub><sup>0</sup> mean the alkene and alkane hydrocarbon with i carbon atom, respectively
